# Supplementary material for: Acriflavine, a Potent Inhibitor of HIF-1α, Disturbs Glucose Metabolism and Suppresses ATF4-Protective Pathways in Melanoma under Non-hypoxic Conditions
Source: PubMed Central journal article supplement (PMC7795823; doi:10.3390/cancers13010102), 2020-12-31
Supplement: cancers-13-00102-s001.pdf [file cancers-13-00102-s001.pdf]

Article

# Acriflavine, a potent inhibitor of HIF1 $\alpha$ , disturbs glucose metabolism and suppresses ATF4-protective pathways in melanoma under non-hypoxic conditions

Román Martí-Díaz, María F. Montenegro, Juan Cabezas-Herrera, Colin R. Goding, José Neptuno Rodríguez-López and Luis Sánchez-del-Campo

## Supplementary Material

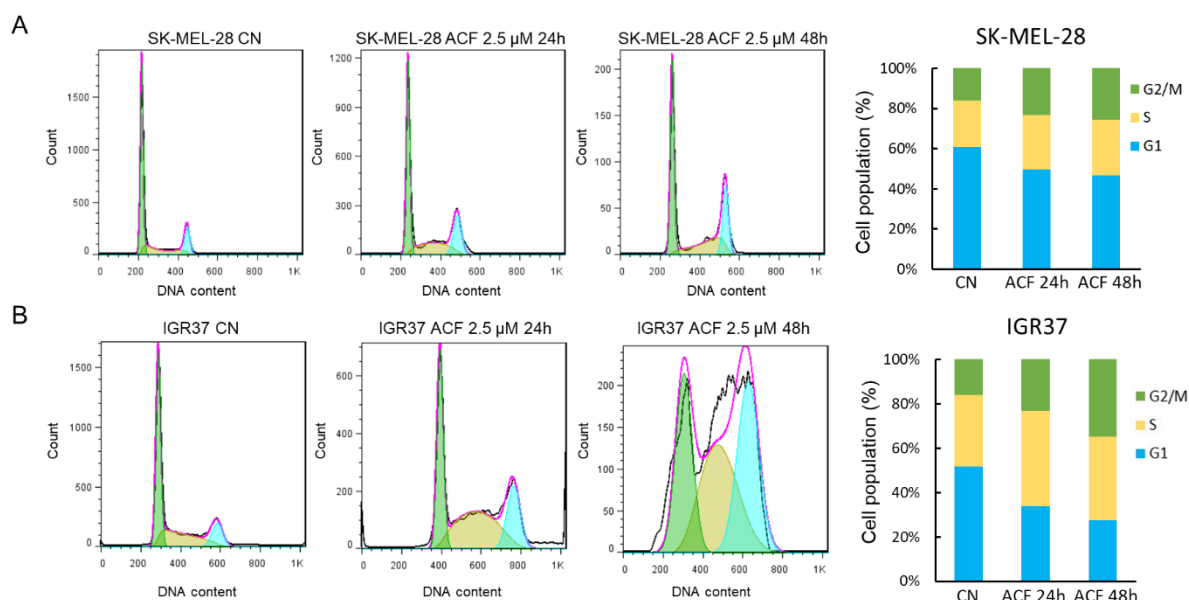

**Figure S1.** Cell cycle assays of SK-MEL-28 (A) and IGR37 (B) cells following ACF indicated treatments. Assays were performed as indicated in Figure 1B.

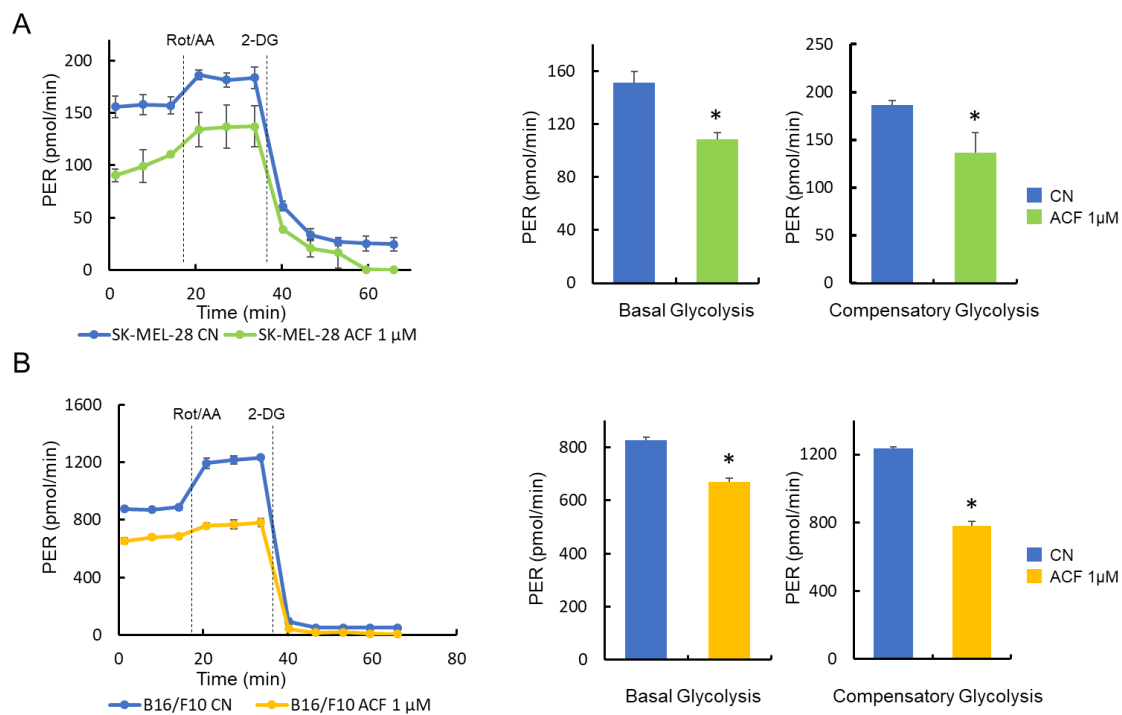

**Figure S2.** Glycolytic proton efflux rate (glycoPER) comparing untreated and ACF-treated melanoma cells. (A) SK-MEL-28 (B) B16/F10. Assays were performed as indicated in Figure 1F. P values for significant differences (Student's *t*-test) are summarized by one asterisk ( $P < 0.05$ ) and groups are compared to ACF-untreated samples.

**Figure S3.** Uncropped Western blots for indicated Figures

**Blots from Figure 1**

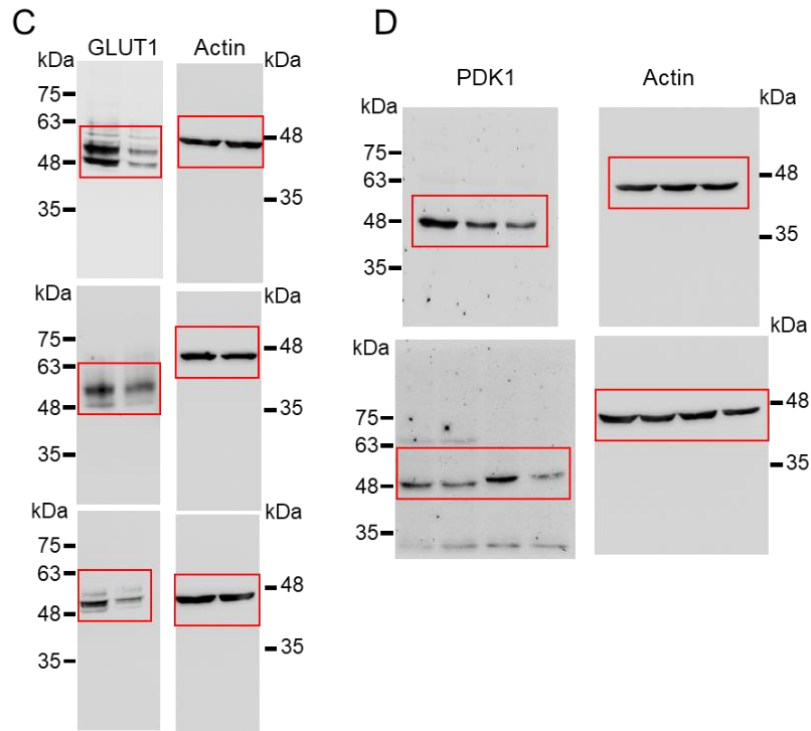

**Blots from Figure 2**

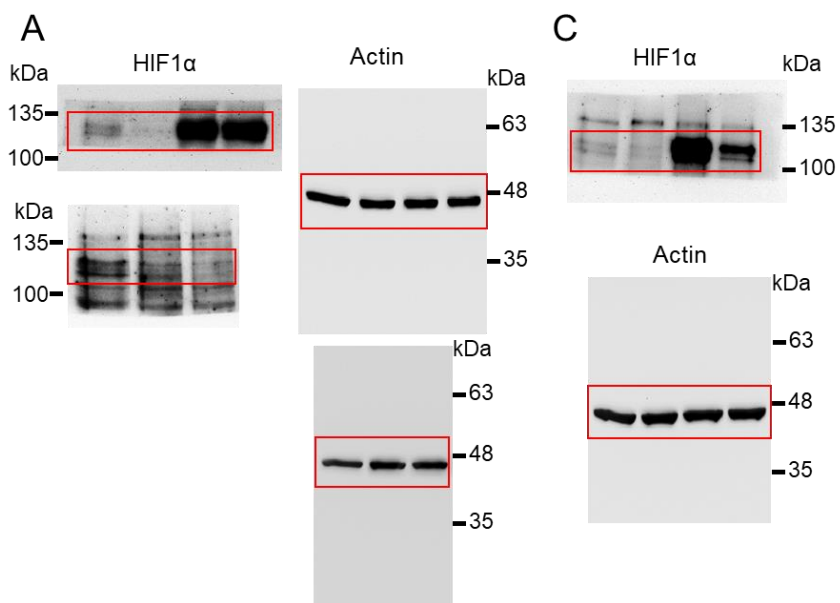

Blots from Figure 3

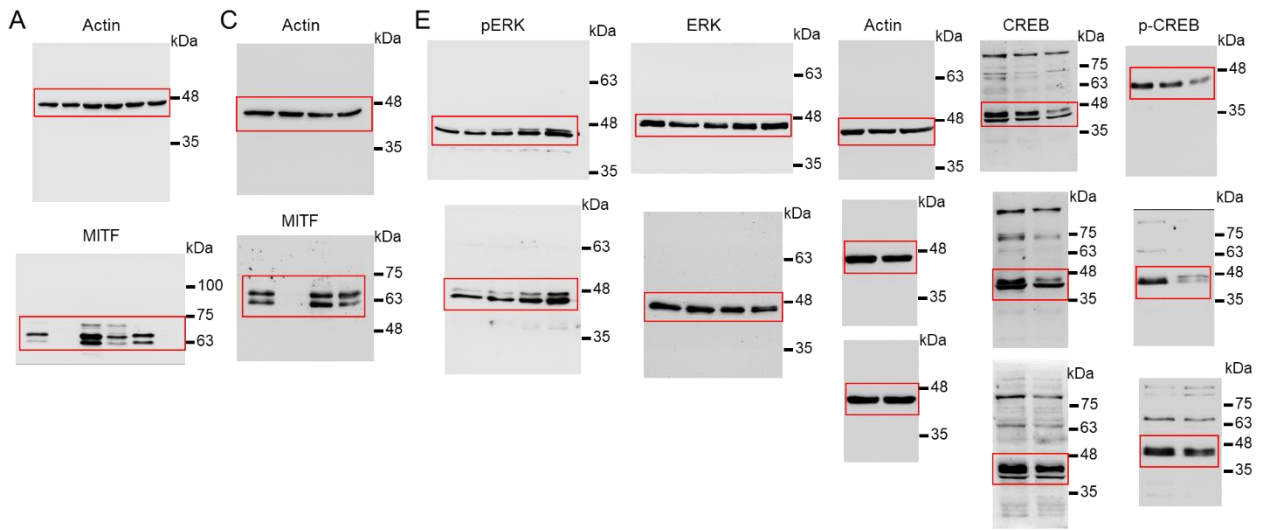

Blots from Figure 4 (A-E)

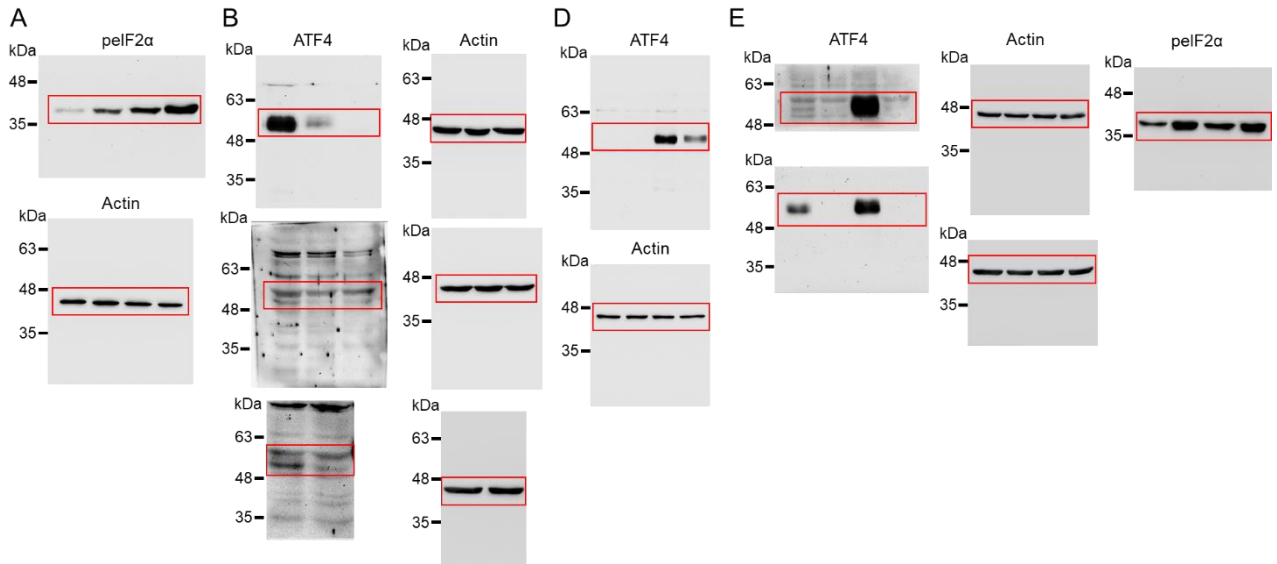

Blots from Figure 4 (F-G)

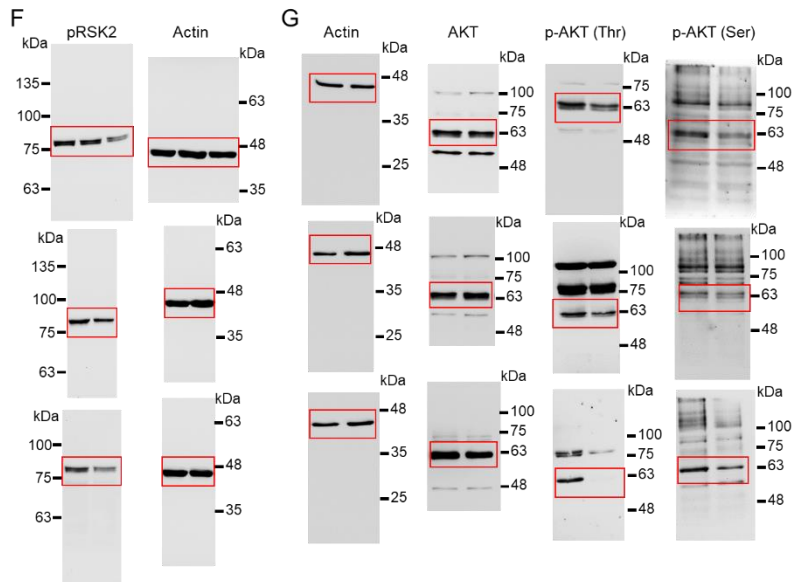

# Blots from Figure 5

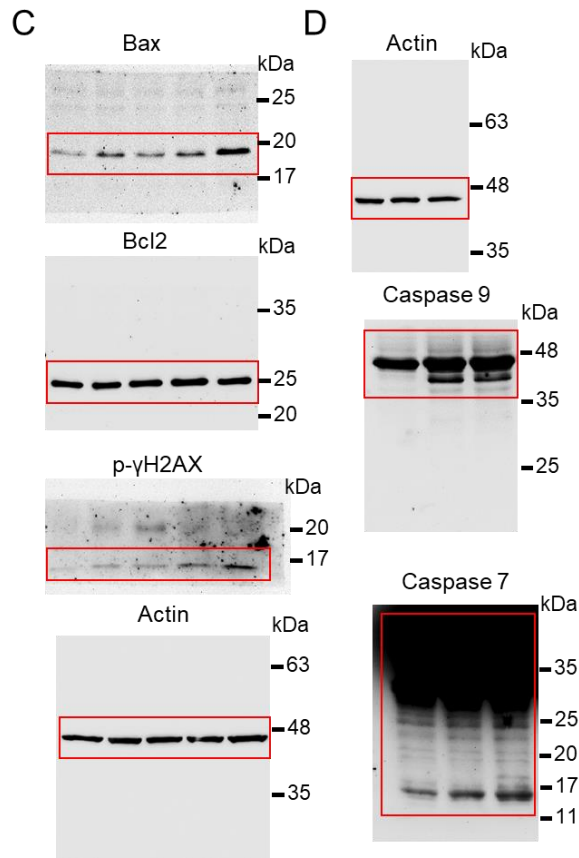

**Table S1.** Used primary antibodies.

| Antibody                                      | Source          | Catalogue number |
|-----------------------------------------------|-----------------|------------------|
| Mouse monoclonal anti- $\beta$ -Actin (AC-15) | Merck/Sigma     | Cat# A5441       |
| Rabbit polyclonal anti-pCREB (Ser133)         | Merck/Millipore | Cat# 06-519      |
| Mouse monoclonal anti-pERK1/2                 | Merck/Sigma     | Cat# M9692       |
| Rabbit monoclonal anti-ATF4 (D4B8)            | Cell Signaling  | Cat# 11815       |
| Mouse monoclonal p- $\gamma$ H2AX (Ser139)    | Merck/Millipore | Cat# 05-636      |
| Mouse monoclonal anti-MITF                    | Merck/Millipore | Cat# MAB3747     |
| Mouse monoclonal anti-BCL2                    | Merck/Sigma     | Cat# B 3170      |
| Rabbit polyclonal anti-BAX                    | Santa Cruz      | Cat# sc-493      |
| Mouse monoclonal anti-HIF1 $\alpha$           | Novus           | Cat# NB100-105   |
| Rabbit monoclonal anti-peIF2 $\alpha$ (Ser51) | Cell Signaling  | Cat# 3597        |
| Rabbit polyclonal anti-ERK2                   | Santa Cruz      | Cat# sc-154      |
| Rabbit polyclonal anti-CREB                   | Merck/Millipore | Cat# 06-863      |
| Mouse monoclonal anti-Caspase-9               | Santa Cruz      | Cat# sc-17784    |
| Rat monoclonal anti-Caspase-7                 | Merck/Sigma     | Cat# C 1104      |
| Mouse monoclonal anti-GLUT1                   | Abcam           | Cat# ab40084     |
| Rabbit monoclonal anti-p-RSK2                 | Abcam           | Cat# ab75820     |
| Mouse monoclonal anti-p-AKT (Thr308)          | Santa Cruz      | Cat# sc-271966   |
| Mouse monoclonal anti-p-AKT (Ser473)          | Merck/Millipore | Cat# 05-1003     |
| Rabbit monoclonal anti-AKT                    | Abcam           | Cat# ab200195    |
| Mouse monoclonal anti-PDK1                    | Thermo Fisher   | Cat# MA5-15797   |

**Table S2.** The following primers for human genes were used.

| Genes                              | Source        |
|------------------------------------|---------------|
| MITF RT qPCR primers               | Thermo-Fisher |
| F 5'-3': GCGCAAAAGAAGCTTGAAAAC     |               |
| R 5'-3': CGTGGATGGAATAAGGGAAA      |               |
| ATF4 RT qPCR primers               | Thermo-Fisher |
| F 5'-3': TCAAACCTCATGGGTTCTCC      |               |
| R 5'-3': GTGTCATCCAACGTGGTCAG      |               |
| PDK1 RT qPCR primers               | Thermo-Fisher |
| F 5'-3': CGGATCAGAAACCGACACA       |               |
| R 5'-3': ACTGAACATTCTGGCTGGTGA     |               |
| HIF1 $\alpha$ RT qPCR primers      | Thermo-Fisher |
| F 5'-3': GAGATGTTAGCTCCCTATATCCCA  |               |
| R 5'-3': TAGGTTCTTGTATTTGAGTCTGCTG |               |
| VEGFA RT qPCR primers              | Thermo-Fisher |
| F 5'-3': TACTGCCATCCAATCGAGAC      |               |
| R 5'-3': GCATGGTGATGTTGGACT        |               |
| $\beta$ -Actin RT qPCR primers     | Thermo-Fisher |
| F 5'-3': AGAAAATCTGGCACCACACC      |               |
| R 5'-3': GGGGTGTTGAAGGTCTCAA       |               |
